# Supplementary material for: Cd-ZnGeON solid solution: the effect of local electronic environment on the photocatalytic water cleavage ability
Source: Royal Society of Chemistry journal article supplement (doi:10.1039/c3ta11192j), 2013-01-01
Supplement: c3ta11192j.pdf [file c3ta11192j.pdf]

## Supporting Information

### Cd-ZnGeON solid solution: effect of local electronic environment on their photocatalytic ability of water cleavage

Neelu Chouhan<sup>a,b</sup>, Ru-Shi Liu<sup>\*a</sup> and Shu-Fen Hu<sup>\*c</sup>

<sup>a</sup>Department of Chemistry, National Taiwan University, Taipei 106, Taiwan.

<sup>b</sup>Department of Pure and Applied Chemistry, University of Kota, Kota, Rajasthan 324005, India.

<sup>c</sup>Department of Physics, National Taiwan Normal University, Taipei-106, Taiwan.

\*Corresponding authors email: rslu@ntu.edu.tw and sfhu.hu@gmail.com

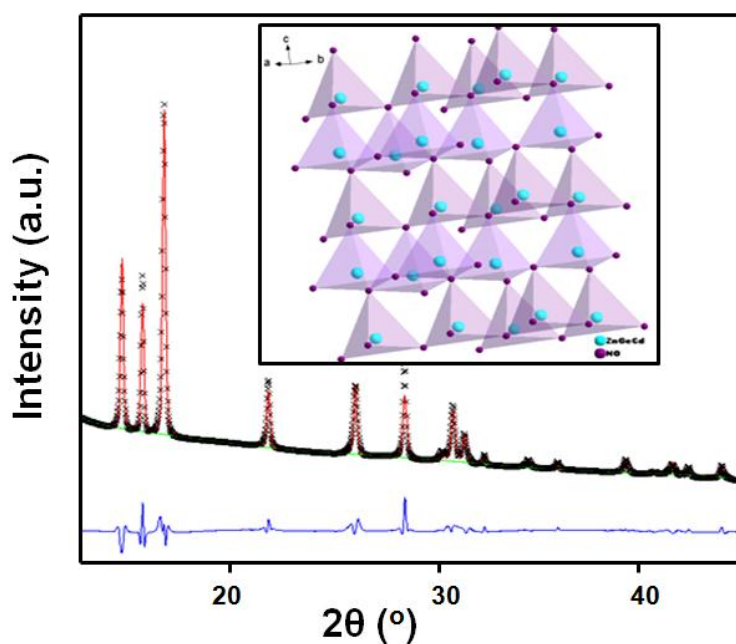

**Figure S1** Experimental (crosses), calculated (solid line), and difference (bottom) results of SR-XRD refinement of wurtzite Cd-ZnGeON sample (nitrided at 800°C), crystallise in a centric primitive hexagonal phase with space group  $P6_3mC$  and their reliability factors  $\chi^2=2.958$ ,  $R_{wp}=0.051$ ,  $R_p=0.0318$  and  $R(f^2)=0.2337$  within a permissible limit. Inset contains a schematic crystal structure of five unit cells, revealing a well ordered array of the CdZnGe (blue) and ON (purple) that arranged in a tetrahedral fashion.

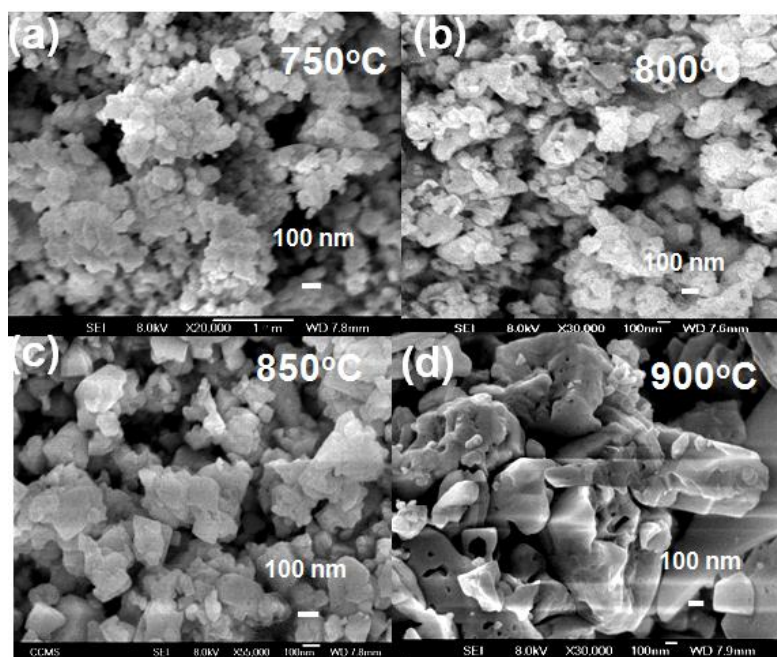

**Figure S2** SEM micrographs of solid solution Cd-ZnGeON synthesised at (a) 750°C, (b) 800°C, (c) 850°C and (d) 900°C, where, 1-bar symbol represents 100nm of particle size.

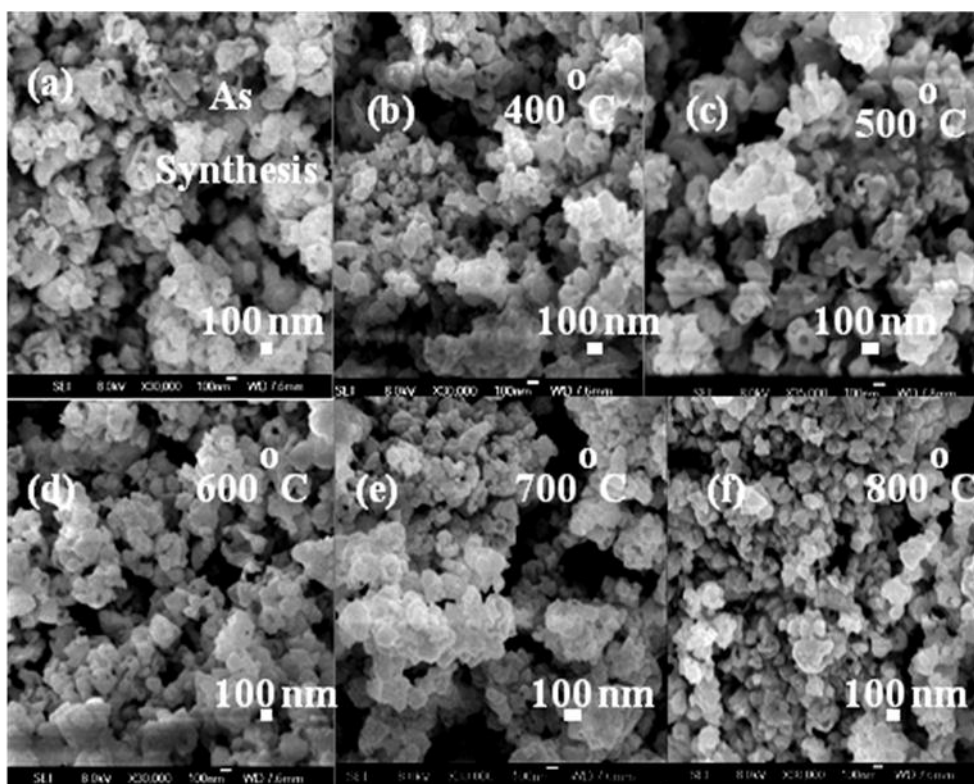

**Figure S3** SEM micrographs of solid solution Cd-ZnGeON calcinated at the temperature (a) as synthesised, (b) 400°C, (c) 500°C, (d) 600°C, (e) 700°C and (f) 800°C, where, bar symbol represents 100nm of particle size.

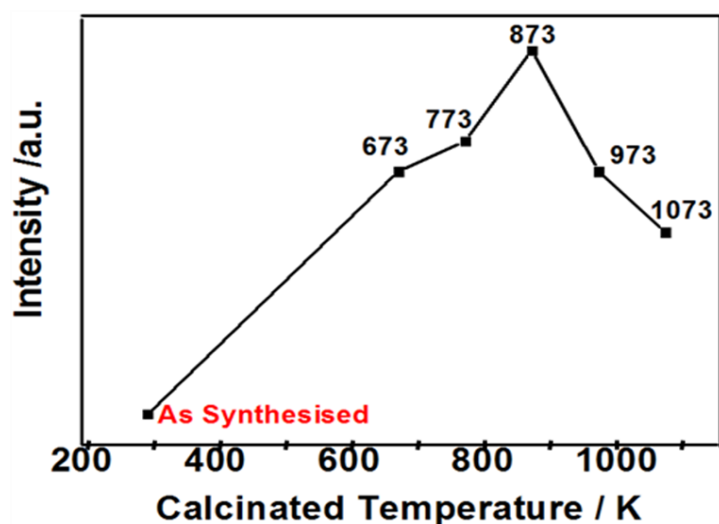

**Figure S4** Plot of the intensity of the adsorption peak Vs the calcination temperature.

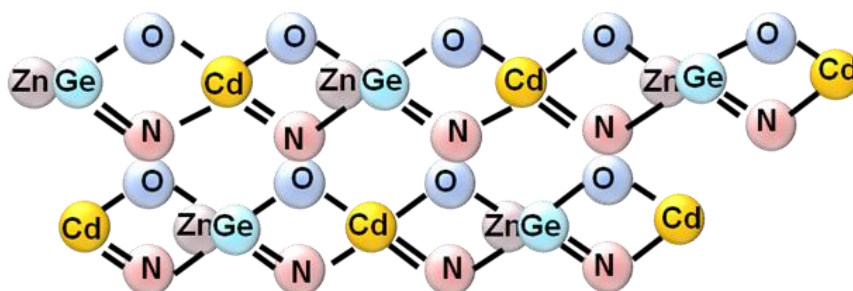

**Figure 5S** Proposed network of the atomic arrangement in Cd-ZnGeON, as elucidated by XRD, DRS, XPS, and XAS analyses.

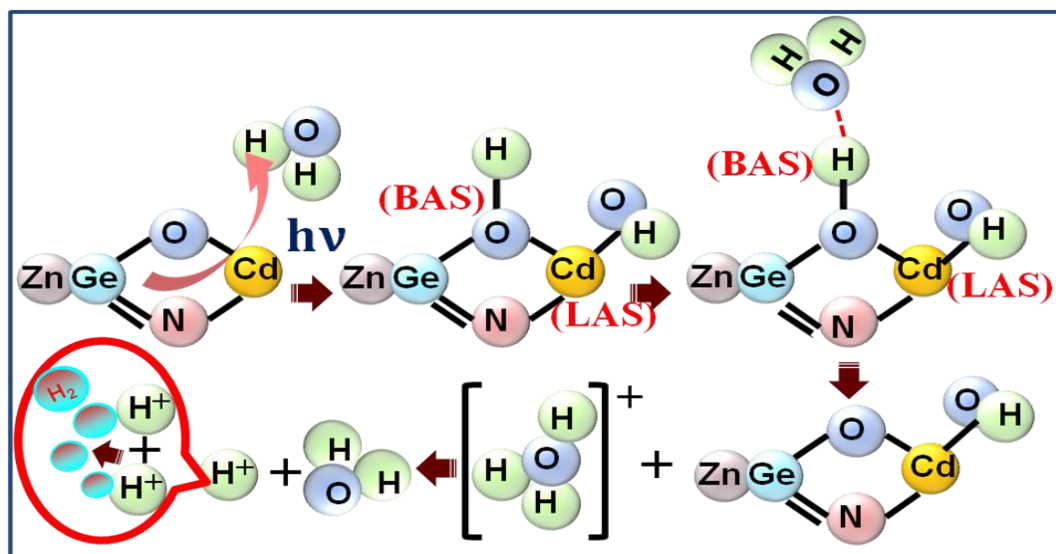

**Figure 6S** Plausible schematic mechanism of water cleavage for hydrogen generation at active reduction sites, within the lattice cluster network of Cd-ZnGeON.

## Tables

**Table.1S** Elemental analyses, particle size, Zn/Ge ratio, shape and chemical composition, of the Cd-ZnGeON prepared at different temperature from 750-900°C at the same 15 hours-nitridation time.

| Temp. (°C) | % N   | % O   | % Zn  | % Ge  | % Cd | Particle size (Zn/Ge)                       | Shape                                   | Chemical Composition                                                              |
|------------|-------|-------|-------|-------|------|---------------------------------------------|-----------------------------------------|-----------------------------------------------------------------------------------|
| 750        | 49.11 | 13.14 | 25.05 | 11.51 | 1.19 | 110-500 nm<br>(2.18)                        | Small flakes                            | $\text{Cd}_{0.10} - (\text{Zn}_{2.18}\text{Ge})(\text{N}_{4.26}\text{O}_{1.14})$  |
| 800        | 52.71 | 9.95  | 21.56 | 15.55 | 0.23 | 100-250 nm<br>(1.39)                        | Voluminous popcorn like                 | $\text{Cd}_{0.01} - (\text{Zn}_{1.39}\text{Ge})(\text{N}_{3.39}\text{O}_{0.64})$  |
| 850        | 59.24 | 6.56  | 18.15 | 16.70 | 0.10 | 150-290 nm<br>(1.09)                        | Flakes                                  | $\text{Cd}_{0.006} - (\text{Zn}_{1.09}\text{Ge})(\text{N}_{3.54}\text{O}_{0.39})$ |
| 900        | 64.43 | 1.69  | 15.86 | 28.49 | 0.06 | 100-350 nm and 4-15 $\mu\text{m}$<br>(0.56) | Smooth cuboids with holes + square rods | $\text{Cd}_{0.002} - (\text{Zn}_{0.56}\text{Ge})(\text{N}_{2.26}\text{O}_{0.06})$ |

**Table.2S** Elemental analyses, particle size, Zn/Ge ratio, shape and chemical composition Color coordinates (X, Y, T and dc) cultivated at different excitation wavelength at room temperature, from PLE plots by utilising software CIE13.3 for the solid solution Cd-ZnGeON, prepared at various nitridation temperature.

| Nitridation Temp. (°C) | Excitation (nm) | X      | Y      | T <sub>c</sub> (K) | dc(e <sup>-02</sup> ) |
|------------------------|-----------------|--------|--------|--------------------|-----------------------|
| 800                    | 210             | 0.2895 | 0.3368 | 7692               | 1.57                  |
| 850                    | 345             | 0.5062 | 0.4603 | 2508               | 1.47                  |
| 900                    | 348             | 0.3856 | 0.4418 | 4260               | 2.33                  |
